# Supplementary material for: Silica Xerogel Doped with Iron(III) as Sensor Material for Salicylhydroxamic Acid Determination in Urine
Source: MDPI journal article supplement (doi:10.3390/gels7030143), 2021-09-16
Supplement: s1 [file s1]

**Table S1.** The calculation of the equilibrium constant.

| Initial SHA concentration, M | Residual SHA concentration, M ([H <sub>2</sub> L]) | lg [H <sub>2</sub> L] | Xerogel absorbance (A <sub>i</sub> ) | lg (A <sub>i</sub> /(A <sub>ex</sub> −A <sub>i</sub> )) |
|------------------------------|----------------------------------------------------|-----------------------|--------------------------------------|---------------------------------------------------------|
| 7.5·10 <sup>−5</sup>         | 6.2·10 <sup>−5</sup>                               | −4.21                 | 0.0179                               | −1.64                                                   |
| 1.5·10 <sup>−4</sup>         | 1.3·10 <sup>−4</sup>                               | −3.88                 | 0.0377                               | −1.31                                                   |
| 2.6·10 <sup>−4</sup>         | 2.2·10 <sup>−4</sup>                               | −3.65                 | 0.0593                               | −1.10                                                   |
| 7.5·10 <sup>−4</sup>         | 6.3·10 <sup>−4</sup>                               | −3.20                 | 0.1344                               | −0.70                                                   |
| 1.5·10 <sup>−3</sup>         | 1.3·10 <sup>−3</sup>                               | −2.90                 | 0.2320                               | −0.39                                                   |
| 2.3·10 <sup>−3</sup>         | 1.9·10 <sup>−3</sup>                               | −2.73                 | 0.3096                               | −0.20                                                   |
| 3.0·10 <sup>−3</sup>         | 2.5·10 <sup>−3</sup>                               | −2.60                 | 0.3729                               | −0.06                                                   |
| 5.0·10 <sup>−3</sup>         | 4.1·10 <sup>−3</sup>                               | −2.38                 | 0.5075                               | 0.23                                                    |
| 1.0·10 <sup>−2</sup>         | 8.7·10 <sup>−3</sup>                               | −2.06                 | 0.6026                               | 0.47                                                    |
| 1.5·10 <sup>−2</sup>         | 1.4·10 <sup>−2</sup>                               | −1.85                 | 0.7182                               | 0.92                                                    |
| 2.0·10 <sup>−2</sup>         | 1.9·10 <sup>−2</sup>                               | −1.72                 | 0.8051 (A <sub>ex</sub> )            | −                                                       |

SHA—Salicylhydroxamic acid.

**Table S2.** The interference of albumin, ascorbic acid, and salicylate on the determination of 1.0·10<sup>−4</sup> M SHA.

| Interfering substance concentration |                        | SHA found ·10 <sup>4</sup> , M | Error, % |
|-------------------------------------|------------------------|--------------------------------|----------|
| Albumin                             | 100 mg/L               | 1.01                           | 0.6      |
|                                     | 500 mg/L               | 0.92                           | −7.7     |
|                                     | 700 mg/L               | 0.94                           | −5.6     |
| Ascorbic acid                       | 1.0·10 <sup>−4</sup> M | 1.05                           | 4.6      |
|                                     | 5.0·10 <sup>−4</sup> M | 1.08                           | 7.5      |
|                                     | 1.0·10 <sup>−3</sup> M | 0.64                           | −35.8    |
| Salicylate                          | 5.0·10 <sup>−4</sup> M | 1.06                           | 5.7      |
|                                     | 1.0·10 <sup>−3</sup> M | 1.09                           | 9.2      |
|                                     | 5.0·10 <sup>−3</sup> M | 1.10                           | 10.3     |

SHA—Salicylhydroxamic acid.
